# Supplementary material for: Muscle-derived interleukin 6 increases exercise capacity by signaling in osteoblasts
Source: JCI journal article supplement (doi:10.1172/jci133572), 2020-02-20
Supplement: sd1 [file 1]

## Supplemental data

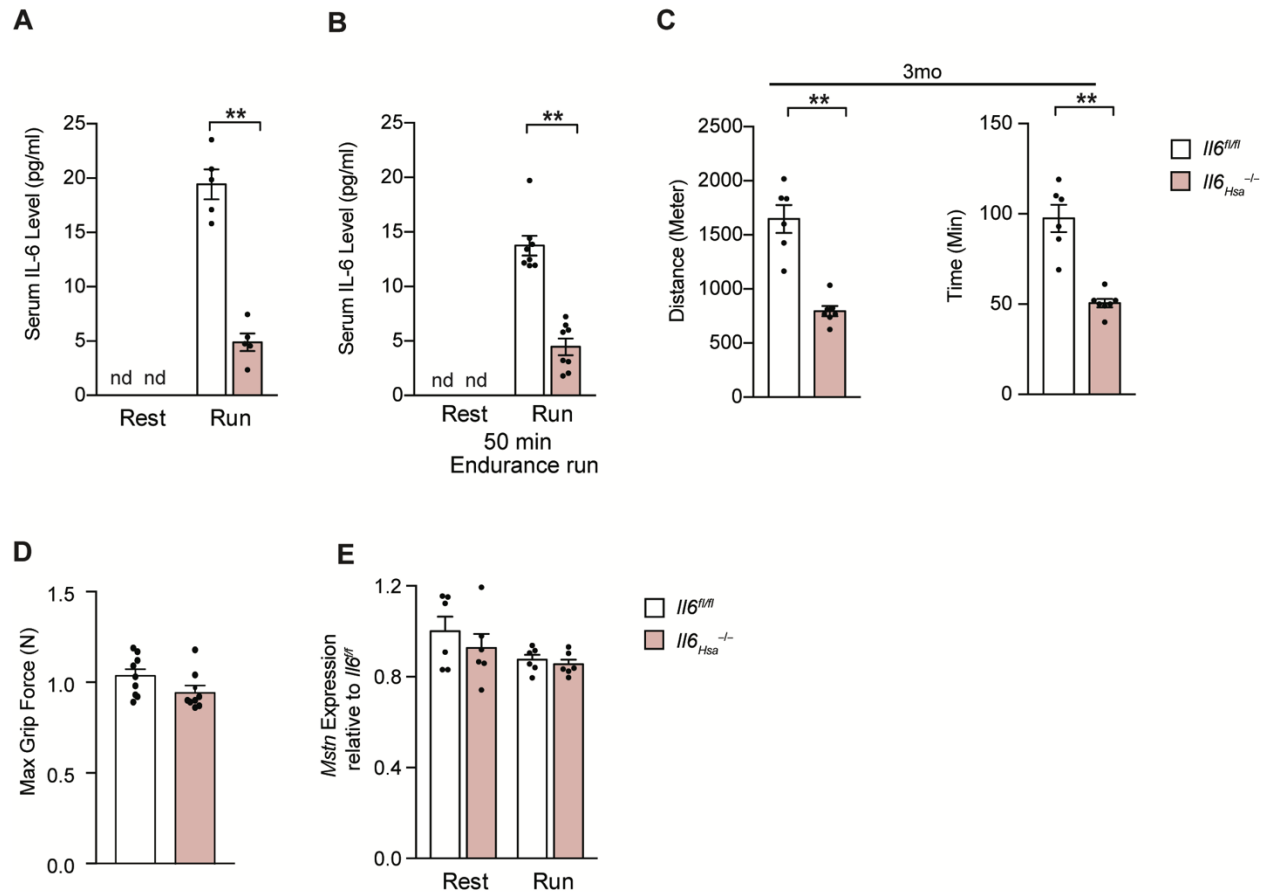

**Figure S1. Related to Figure 2. Muscle derived IL-6 is needed for maximal exercise capacity.**

(A) Circulating IL-6 levels in 3-month-old male *Il6<sup>ff</sup>* and *Il6<sub>Hsa</sub><sup>-/-</sup>* mice at rest and after exercise. (B) Circulating IL-6 levels during 50 min endurance run of 3-month-old female *Il6<sup>ff</sup>* and *Il6<sub>Hsa</sub><sup>-/-</sup>* mice. (C) Performance during an endurance run of 3, and 6-month-old *Il6<sup>ff</sup>* and *Il6<sub>Hsa</sub><sup>-/-</sup>* male mice. (D) Muscle strength determined as the maximal grip force in 3-month-old *Il6<sup>ff</sup>* and *Il6<sub>Hsa</sub><sup>-/-</sup>* female mice. (E) *Mstn* expression 3-month-old male *Il6<sup>ff</sup>* and *Il6<sub>Hsa</sub><sup>-/-</sup>* mice at rest and after exercise. All these experiments are representative of three independent experiments. Data shown in C, D were analyzed by 2-tailed unpaired t test and data in A and E Tukey's post hoc test. Results represent the mean+ SEM.

A  *Il6<sup>fl/fl</sup>* Osb/ *Il6<sup>fl/fl</sup>* OPCs  
 *Il6<sup>-/-</sup>* Osb/ *Il6<sup>fl/fl</sup>* OPCs  
 CRE adenovirus-mediated recombination

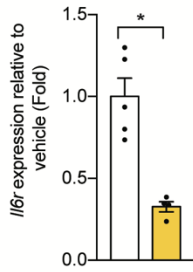

| IL6r                                                                           |       | Hprt  |          | Δ Cp     |         |  |          |
|--------------------------------------------------------------------------------|-------|-------|----------|----------|---------|--|----------|
| <i>Il6<sup>fl/fl</sup></i> OB/ <i>Il6<sup>fl/fl</sup></i> Opc with Adeno Empty | 34.57 | 27.34 | 0.006673 |          |         |  | 0.93655  |
|                                                                                | 34.39 | 26.93 | 0.005708 |          |         |  | 0.8011   |
|                                                                                | 34.27 | 27.44 | 0.008752 |          |         |  | 1.22826  |
|                                                                                | 34.60 | 27.84 | 0.009254 |          |         |  | 1.29874  |
|                                                                                | 34.88 | 27.30 | 0.005240 | 0.007126 | 1       |  | 0.73535  |
|                                                                                |       |       |          |          | Average |  | 1        |
|                                                                                |       |       |          |          | Devest  |  | 0.25248  |
|                                                                                |       |       |          |          | SEM     |  | 0.11291  |
| Hprt                                                                           |       | Δ Cp  |          |          |         |  |          |
| <i>Il6<sup>-/-</sup></i> OB/ <i>Il6<sup>fl/fl</sup></i> Opc with adeno Cre     | 36.12 | 26.92 | 0.001696 |          |         |  | 0.237998 |
|                                                                                | 35.87 | 27.37 | 0.002749 |          |         |  | 0.385771 |
|                                                                                | 36.27 | 27.56 | 0.002399 |          |         |  | 0.336677 |
|                                                                                | 36.10 | 27.44 | 0.002471 |          |         |  | 0.346844 |
|                                                                                |       |       |          |          | Average |  | 0.32682  |
|                                                                                |       |       |          |          | Devest  |  | 0.06288  |
|                                                                                |       |       |          |          | SEM     |  | 0.03144  |
|                                                                                |       |       |          |          | t test  |  | 0.00292  |

B  *Il6<sup>fl/fl</sup>* Osb/ *Il6<sup>fl/fl</sup>* OPCs  
 *Il6<sup>fl/fl</sup>* Osb/ *Il6<sup>-/-</sup>* OPCs  
 CRE adenovirus-mediated recombination

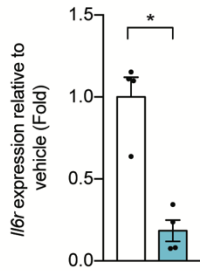

|                                                                                |       |       |          |          |         |  |         |
|--------------------------------------------------------------------------------|-------|-------|----------|----------|---------|--|---------|
| <i>Il6<sup>fl/fl</sup></i> OB/ <i>Il6<sup>fl/fl</sup></i> Opc with Adeno Empty | 33.88 | 27.16 | 0.009482 |          |         |  | 1.11125 |
|                                                                                | 33.80 | 26.28 | 0.005446 |          |         |  | 0.63821 |
|                                                                                | 34.07 | 27.34 | 0.009373 |          |         |  | 1.09846 |
|                                                                                | 34.16 | 27.49 | 0.009831 |          |         |  | 1.15207 |
|                                                                                |       |       |          | 0.008533 | Average |  | 1       |
|                                                                                |       |       |          |          | Devest  |  | 0.24227 |
|                                                                                |       |       |          |          | SEM     |  | 0.12114 |
|                                                                                |       |       |          |          | t test  |  |         |
| Hprt                                                                           |       | Δ Cp  |          |          |         |  |         |
| <i>Il6<sup>fl/fl</sup></i> OB/ <i>Il6<sup>fl/fl</sup></i> Opc with Adeno Cre   | 36.78 | 26.29 | 0.000692 |          |         |  | 0.08107 |
|                                                                                | 37.65 | 27.05 | 0.000644 |          |         |  | 0.07544 |
|                                                                                | 36.61 | 28.20 | 0.002932 |          |         |  | 0.34366 |
|                                                                                | 36.62 | 27.68 | 0.002032 |          |         |  | 0.23816 |
|                                                                                |       |       |          | 0.001575 | Average |  | 0.18459 |
|                                                                                |       |       |          |          | Devest  |  | 0.13013 |
|                                                                                |       |       |          |          | SEM     |  | 0.06507 |
|                                                                                |       |       |          |          | t test  |  | 0.01672 |

C

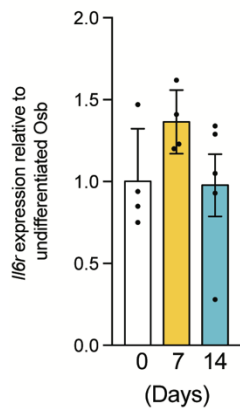

D

*Il6<sup>fl/fl</sup>* Osb/ *Il6<sup>fl/fl</sup>* OPCs  
 *Il6<sup>-/-</sup>* Osb/ *Il6<sup>fl/fl</sup>* OPCs

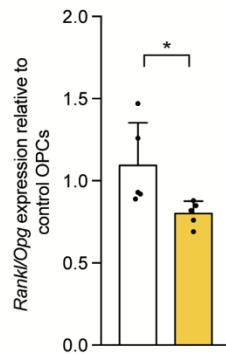

**Figure S2: Related to Figure 5: IL-6 favors osteoclastogenesis by signaling in osteoblasts.**

**(A)** Deletion efficiency of *Il6r* in osteoblasts. Co-culture of *Il6<sup>fl/fl</sup>* osteoblasts infected with either adenovirus expressing the empty vector or Cre recombinase with *Il6<sup>fl/fl</sup>* osteoclast

precursor cells. **(B)** Deletion efficiency of *Il6r* in osteoclast precursor cells. Co-culture of *Il6r<sup>fl/fl</sup>* osteoblasts with *Il6r<sup>fl/fl</sup>* osteoclast precursor cells infected with either adenovirus expressing the empty vector or Cre. **(C)** Expression level of *Il6r* mRNA in the cultured osteoblasts isolated from 4days calvarias with at different time points (0,7,14days) in osteoblast mineralization medium, n=4. **(D)** Ratio of *Rankl* and *Opg* expression in co-culture of (1) *Il6r<sup>fl/fl</sup>* osteoblasts with *Il6r<sup>fl/fl</sup>* OPCs, (2) *Il6r<sup>Osb</sup><sup>-/-</sup>* osteoblasts with *Il6<sup>fl/fl</sup>* OPCs in presence of IL-6 and sIL-6r. These experiments are representative of 3 independent experiments. Data in A, B and D by 2-tailed unpaired t test whereas C were analyzed by one-way ANOVA followed by Tukey's post hoc test. Error bars represent SEM. Results represent the mean+ SEM. \*P < 0.05, \*\*P < 0.01.

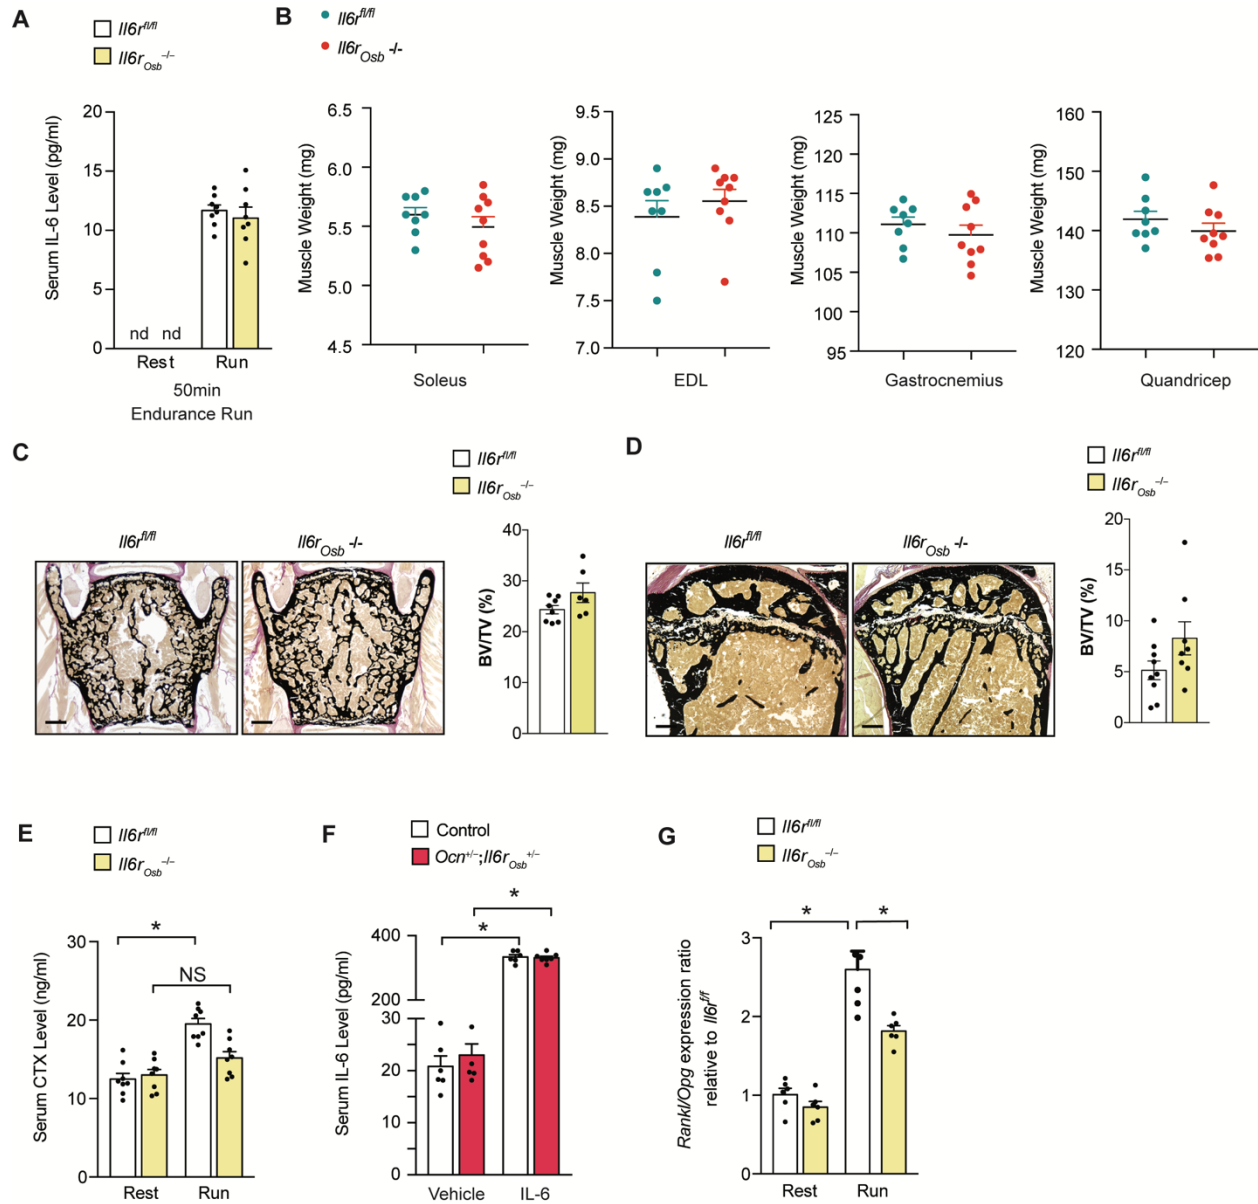

**Figure S3: Related to Figure 6. mIL-6 favors exercise capacity in part through osteocalcin**

Circulating IL-6 levels during 50 min endurance run of 3-month-old female *Il6<sup>ff</sup>* and *Il6<sup>Hsa</sup>-/-* mice, n=8. **(B)** Weight of hindlimb muscles such as Soleus, EDL, Gastrocnemius and quadriceps in 3month-old *Il6<sup>ff</sup>* and *Il6<sup>rOsb</sup>-/-* mice, n=8-10. **(C-D)** Bone histology and histomorphometry of **(C)** lumbar vertebrae, n=6-8 **(D)** tibiae from 6-month-old *Il6<sup>ff</sup>* and

*Il6<sup>osb</sup><sup>-/-</sup>* mice, n=6-8. **(E)** Circulating IL-6 levels in 3-month-old controls: WT, *Il6<sup>osb</sup><sup>+/-</sup>*, *Osteocalcin* +/- and *Il6<sup>osb</sup><sup>+/-</sup>; Osteocalcin* +/- mice treated with IL-6 (3ng/g), n=5-7. **(F)** Circulating CTX levels in 5-month-old *Il6<sup>ff</sup>* and *Il6<sup>osb</sup><sup>-/-</sup>* mice n=6. **(G)** *Rankl/Opg* expression ratio in the Femur of 3-month-old *Il6<sup>ff</sup>* and *Il6<sup>osb</sup><sup>-/-</sup>* mice n=6. These experiments are representative of 3 independent experiments. Data in B, C and D by 2-tailed unpaired t test whereas A, E, F and G were analyzed by one-way ANOVA followed by Tukey's post hoc test. Error bars represent SEM. Results represent the mean+ SEM. \*P < 0.05, \*\*P < 0.01.

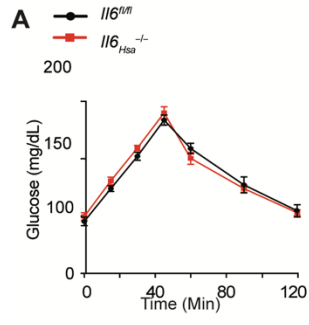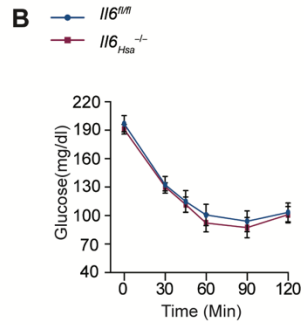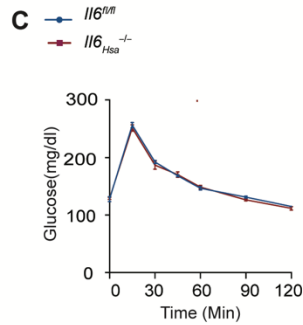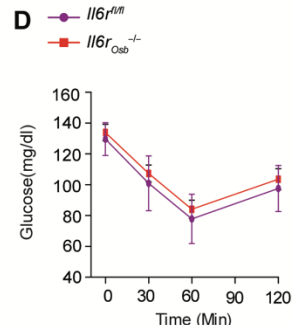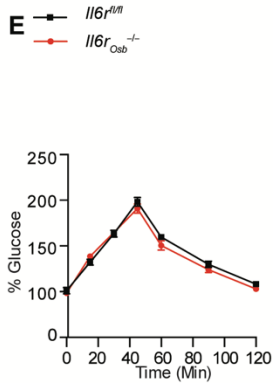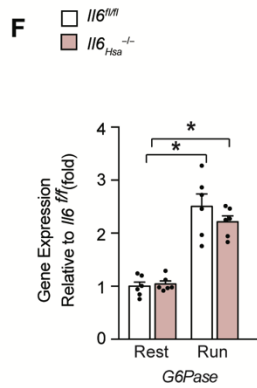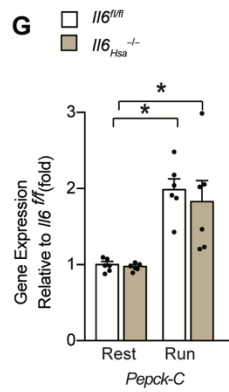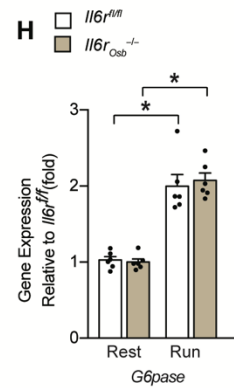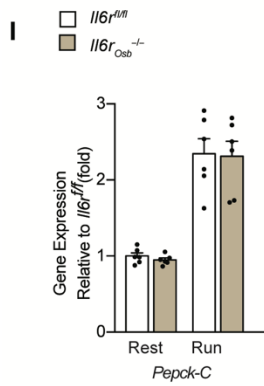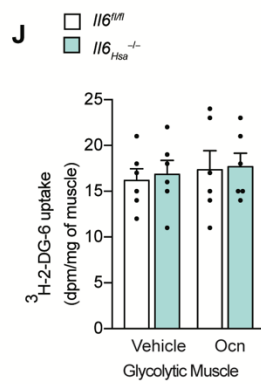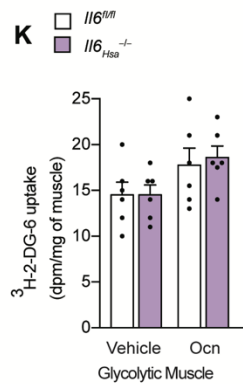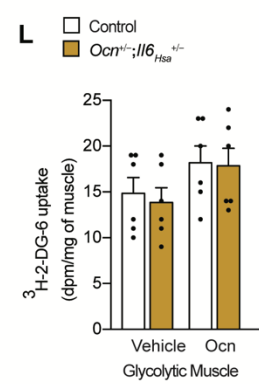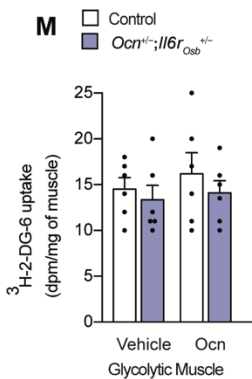

**Figure S4: Related to Figure 8. mIL-6 favors glucose uptake and catabolism in myofibers during exercise through osteocalcin.**

(A) Blood glucose levels during a PTT in 3-month-old *Il6<sup>ff</sup>* and *Il6<sup>Hsa</sup>-/-* littermate mice, n=6. (B) Blood glucose levels during an ITT of 3-month-old *Il6<sup>ff</sup>* and *Il6<sup>Hsa</sup>-/-* mice, n=6. (C-E) Blood glucose levels during a (C) GTT (D) ITT (E) PTT in 3-month-old *Il6<sup>ff</sup>* and *Il6<sup>rosb</sup>-/-* mice, n=6. (F-G) Expression of (F) *G6Pase*, (G) *Pepck-c* at rest and after exercise in livers of 3-month-old *Il6<sup>ff</sup>* and *Il6<sup>Hsa</sup>-/-* mice, n=6. (H-I) Expression of (H) *G6Pase*, (I) *Pepck-c* at rest and after exercise in livers of 3-month-old *Il6<sup>ff</sup>* and *Il6<sup>rosb</sup>-/-* mice, n=6. (J-M) Uptake of <sup>3</sup>H-2-DG in glycolytic (Gly, white quadriceps) muscles treated with Ocn after exercise in 3-month-old mice, n=6 (J) *Il6<sup>ff</sup>* vs *Il6<sup>Hsa</sup>-/-* (K) *Il6<sup>ff</sup>* vs *Il6<sup>rosb</sup>-/-*. (L) Controls (WT, *Il6<sup>Hsa</sup>+/-* and *Osteocalcin+/-*) vs *Osteocalcin+/-;Il6<sup>Hsa</sup>+/-* (M) controls (WT, *Il6<sup>rosb</sup>+/-* and *Osteocalcin+/-*) vs *Osteocalcin +/-;Il6<sup>rosb</sup>+/-* n=6. These experiments are representative of 3 independent experiments. Data were analyzed by 1-way ANOVA followed by Tukey's post hoc test. Error bars represent SEM. Results represent the mean+ SEM. \*P < 0.05.

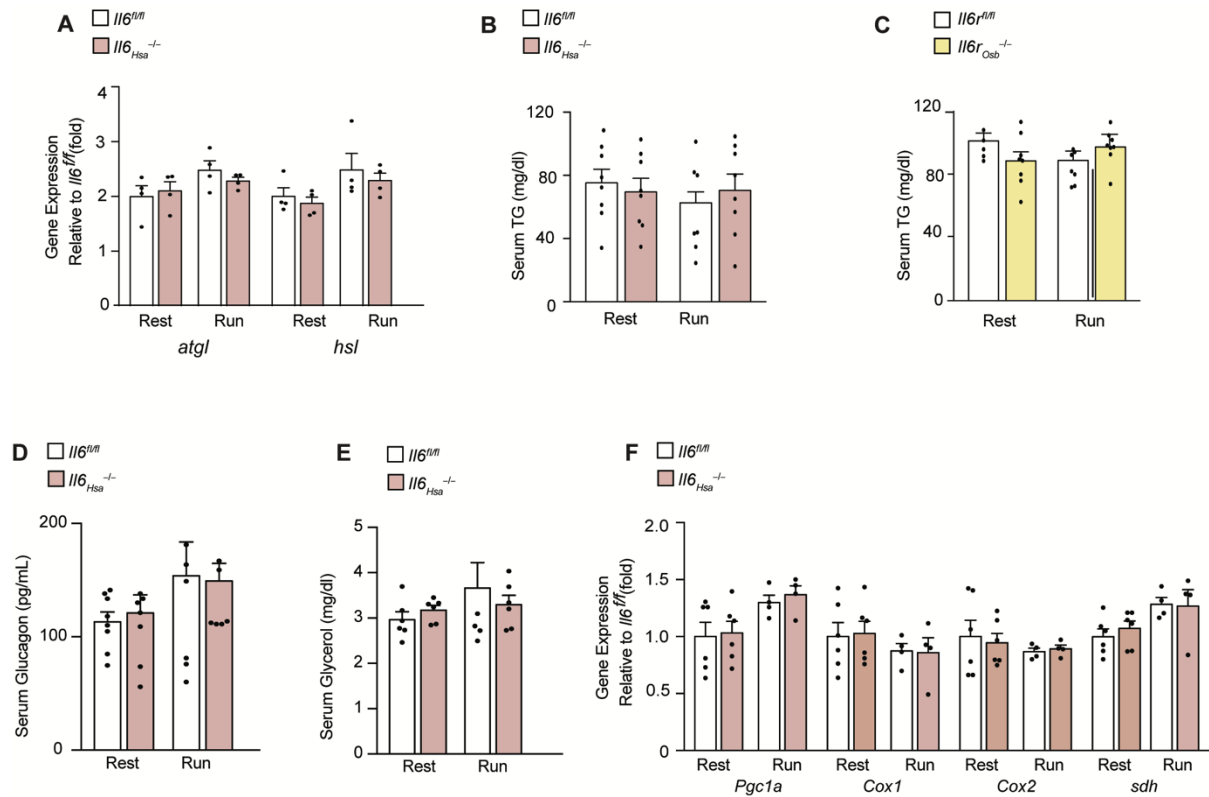

**Figure S5: Related to Figure 9. mIL-6 favors fatty acid uptake and catabolism in myofibers during exercise through osteocalcin.**

(A) *Hsl*, *atgl* expression at rest and after exercise in white adipose tissue of 3-month-old  $Il6^{ff/ff}$  and  $Il6_{Hsa}^{-/-}$  mice, n=4. (B-C) Serum triglycerides levels at rest and after exercise in 3-month-old (B)  $Il6_{Hsa}^{-/-}$  and (C)  $Il6_{Osb}^{-/-}$  and their respective controls ( $Il6^{ff/ff}$  and  $Il6^{r/ff}$ ), n=8. (D) Circulating glucagon and (E) glycerol levels at rest and after exercise in 3-month-old  $Il6_{Hsa}^{-/-}$  and  $Il6_{Osb}^{-/-}$  mice and their respective controls, n=8. (F) *Pgc1a*, *Cox1*, *Cox2*, *SDH* expression at rest and after exercise in gastrocnemius muscles of 3-month-old  $Il6^{ff/ff}$  and  $Il6_{Hsa}^{-/-}$  mice, n=6. These experiments are representative of three independent experiments. Data were analyzed by one-way ANOVA followed by Tukey's post hoc test. Error bars represent SEM. Results represent the mean+ SEM. \*P < 0.05.
